# Supplementary material
Source: Royal Society of Chemistry journal article supplement (doi:10.1039/d6ay00524a)
Supplement: d6ay00524a1.pdf [file d6ay00524a1.pdf]

## SUPPORTING INFORMATION

**Table S1.** Nucleic acid sequence used in the experiments

| Title          | Sequence (5' to 3')                                    |
|----------------|--------------------------------------------------------|
| HP-1           | UUG CUU AUC AGA CUG AUG UUG AUG UUC                    |
| HP-2           | UAG CUU AUC AGA CUG AUG UAG UAC AAG                    |
| HP-3           | UAG CAU AUC AGA CUG AUG UUG AUG UUC                    |
| L1             | TTG ATG TTC TAA TAC GAC TCA CTA TAG GG                 |
| L2             | ATT ATG CTG AGT GAT ATC CC                             |
| Reporter-probe | FAM-TTATT-BHQ                                          |
| crRNA          | UAA UUU CUA CUC UUG UAG AU                             |
| dsDNA          | UAA UUU CUA CUC UUG UAG AUG UCG AGC GUC<br>GAU GCU AGC |
| M1             | UAA GUC UGA UGU UGU GUG AGGU                           |
| M2             | UAU GUC UGA UGU UGU GUG AGGU                           |
| miRNA-21       | UAG CUU AUC AGA CUG AUG UUG A                          |
| miRNA-34a      | UGG CAG UGU CUU AGC UGG UUGU                           |
| miRNA-155      | UGA GUC UGA UGU UGU GUG AGGU                           |
| miRNA-146a     | UGA GAA CUG AAU UCC AUG GGUU                           |

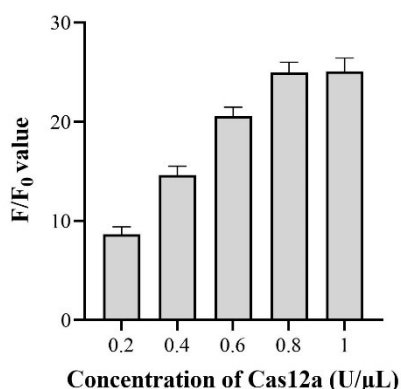

**Figure S1:** Fluorescence intensity ratio of the method when detecting target miRNA with different concentration of Cas12a protein.
